# Supplementary material for: Degradation Potential of Xerophilic and Xerotolerant Fungi Contaminating Historic Canvas Paintings
Source: MDPI journal article supplement (doi:10.3390/jof10010076), 2024-01-18
Supplement: s1 [file s1]

## Supplementary Material

### Degradation potential of xerophilic and xerotolerant fungi contaminating historic canvas paintings

Amela Kujović, Cene Gostinčar, Katja Kavkler, Natalija Govedić, Nina Gunde-Cimerman, Polona

Zalar\* \* **Correspondence:** Polona Zalar: polona.zalar@bf.uni-lj.si

#### 1 Supplementary Tables

**Table S1:** Cultures used in this study, their source and identification.

| EXF strain nr. | Fungal name                   | Source          | Support        | Paint                 | Isolation side | Identification DNA barcode: GenBank No. | Reference         |
|----------------|-------------------------------|-----------------|----------------|-----------------------|----------------|-----------------------------------------|-------------------|
| 10648          | <i>Akanthomyces muscarius</i> | painting GM 1   | flax canvas    | acrylate              | V              | ITS: MW288713                           | Zalar et al. 2023 |
| 10559          | <i>Alternaria</i> sp.         | painting GBJ 2  | unknown canvas | oil                   | V              | ITS: MW288710                           | Zalar et al. 2023 |
| 10651          | <i>Alternaria</i> sp.         | painting GM 2   | veneer         | oil                   | V              | ITS: MW288712                           | Zalar et al. 2023 |
| 7660           | <i>Aspergillus conicus</i>    | painting RCS 16 | flax canvas    | oil or greasy tempera | R              | <i>BenA</i> : MW357091                  | Zalar et al. 2023 |
| 7677           | <i>Aspergillus creber</i>     | painting RCS 19 | flax canvas    | oil                   | R              | <i>BenA</i> : MW357095                  | Zalar et al. 2023 |
| 10360          | <i>Aspergillus destruens</i>  | painting RCS 25 | flax canvas    | oil                   | V              | <i>BenA</i> : MW369690                  | Zalar et al. 2023 |
| 7651           | <i>Aspergillus destruens</i>  | painting RCS 15 | flax canvas    | oil                   | R              | <i>BenA</i> : MW369703                  | Zalar et al. 2023 |
| 10462          | <i>Aspergillus domesticus</i> | painting RCS 24 | flax canvas    | oil                   | V              | <i>BenA</i> : MW357175                  | Zalar et al. 2023 |
| 10450          | <i>Aspergillus infrequens</i> | painting RCS 25 | flax canvas    | oil                   | V              | <i>BenA</i> : MW357179                  | Zalar et al. 2023 |

| EXF strain nr. | Fungal name                         | Source                       | Support                                                         | Paint                 | Isolation side | Identification DNA barcode: GenBank No. | Reference         |
|----------------|-------------------------------------|------------------------------|-----------------------------------------------------------------|-----------------------|----------------|-----------------------------------------|-------------------|
| 10405          | <i>Aspergillus jensenii</i>         | painting RCS 15              | flax canvas                                                     | oil                   | R              | BenA: MW357112                          | Zalar et al. 2023 |
| 10353          | <i>Aspergillus magnivesiculatus</i> | painting RCS 24              | flax canvas                                                     | oil                   | V              | BenA: MW357145                          | Zalar et al. 2023 |
| 10425          | <i>Aspergillus penicillioides</i>   | painting RCS 24              | flax canvas                                                     | oil                   | V              | BenA: MW357162                          | Zalar et al. 2023 |
| 15555          | <i>Aspergillus proliferans</i>      | painting ART-4               | unknown canvas                                                  | oil                   | R              | BenA: PP034129                          | Zalar et al. 2023 |
| 15119          | <i>Aspergillus pseudoglaucus</i>    | painting RCS 22              | hemp and flax canvas                                            | oil or greasy tempera | V              | BenA: MW357166                          | Zalar et al. 2023 |
| 14316          | <i>Aspergillus pseudoglaucus</i>    | mock up sample contamination | wood impregnated with animal glue, oil paint, and Regalrez 1126 | oil                   | V              | BenA: PP034128                          | this study        |
| 7678           | <i>Aspergillus puulaauensis</i>     | painting RCS 19              | flax canvas                                                     | oil                   | R              | BenA: MW357120                          | Zalar et al. 2023 |
| 10429          | <i>Aspergillus reticulatus</i>      | painting RCS 21              | flax canvas                                                     | oil or greasy tempera | R              | BenA: MW357169                          | Zalar et al. 2023 |
| 10401          | <i>Aspergillus salinicola</i>       | painting RCS 22              | hemp and flax canvas                                            | oil or greasy tempera | V              | BenA: MW357181                          | Zalar et al. 2023 |
| 7656           | <i>Aspergillus sloanii</i>          | painting RCS 16              | flax canvas                                                     | oil or greasy tempera | R              | BenA: MW357182                          | Zalar et al. 2023 |
| 10431          | <i>Aspergillus tardicrescens</i>    | painting RCS 25              | flax canvas                                                     | oil                   | R              | BenA: MW357143                          | Zalar et al. 2023 |
| 10463          | <i>Aspergillus vitricola</i>        | painting RCS 26              | flax canvas                                                     | oil                   | R              | BenA: MW357199                          | Zalar et al. 2023 |
| 15210          | <i>Aspergillus vitricola</i>        | painting RCS 22              | hemp canvas                                                     | oil or greasy tempera | R              | ITS: PP033020                           | Zalar et al. 2023 |
| 10372          | <i>Aureobasidium melanogenum</i>    | air in RCS depository        | -                                                               | -                     | -              | ITS: MW288717                           | Zalar et al. 2023 |
| 14317          | <i>Aureobasidium pullulans</i>      | mock up sample contamination | wood, animal glue, oil paint, Beva 371                          | oil                   | V              | ITS: PP033021                           | this study        |
| 10556          | <i>Beauveria pseudobassiana</i>     | painting GBJ 2               | unknown canvas                                                  | oil                   | V              | ITS: MW288719                           | Zalar et al. 2023 |
| 15111          | <i>Bjerkandera adusta</i>           | painting RCS 22              | hemp and flax canvas                                            | oil or greasy tempera | V              | ITS: MW288722                           | Zalar et al. 2023 |
| 10840          | <i>Botryotrichum domesticum</i>     | painting RCS 24              | flax canvas                                                     | oil                   | V              | ITS: MW288937                           | Zalar et al. 2023 |
| 7669           | <i>Chaetomium cochlioides</i>       | painting RCS 16              | flax canvas                                                     | oil or greasy tempera | R              | ITS: MW288932                           | Zalar et al. 2023 |
| 7690           | <i>Chaetomium globosum</i>          | painting RCS 18              | hemp canvas                                                     | oil                   | R              | ITS: MW288933                           | Zalar et al. 2023 |
| 10573          | <i>Cladosporium allicinum</i>       | painting GBJ 1               | plywood                                                         | oil                   | V              | act: MW387133                           | Zalar et al. 2023 |
| 14315          | <i>Cladosporium cladosporioides</i> | mock up sample contamination | glass impregnated with Regalrez 1126                            | -                     | -              | act: PP034131                           | this study        |

| EXF strain nr. | Fungal name                               | Source                       | Support                             | Paint                  | Isolation side | Identification DNA barcode: GenBank No. | Reference           |
|----------------|-------------------------------------------|------------------------------|-------------------------------------|------------------------|----------------|-----------------------------------------|---------------------|
| 10496          | <i>Cladosporium pseudocladosporioides</i> | painting GBJ 2               | unknown canvas                      | oil                    | V              | act: MW369723                           | Zalar et al. 2023   |
| 14314          | <i>Cladosporium pseudocladosporioides</i> | mock up sample contamination | glass impregnated with Paraloid B72 | -                      | V              | act: PP034132                           | this study          |
| 10492          | <i>Cladosporium westerdijkiae</i>         | painting GBJ 1               | plywood                             | oil                    | V              | tefI: MW387144                          | Zalar et al. 2023   |
| 10656          | <i>Cladosporium xylophilum</i>            | painting GM 2                | veneer                              | oil                    | V              | tefI: MW387151                          | Zalar et al. 2023   |
| 15505          | <i>Coniochaeta ligninaria</i>             | painting ART-4               | unknown canvas                      | oil                    | V              | ITS: OR097691                           | Zalar et al. 2023   |
| 15086          | <i>Cylindrobasidium sp.</i>               | painting ART-1               | flax canvas                         | oil                    | V              | ITS: MW288728                           | Zalar et al. 2023   |
| 10652          | <i>Debaryomyces hansenii</i>              | painting GM 2                | veneer                              | oil                    | V              | ITS: MW288763                           | Zalar et al. 2023   |
| 10694          | <i>Parengyodontium album</i>              | Celje ceiling                | linen canvas                        | tempera                | V              | ITS: MZ687377                           | Kavkler et al. 2022 |
| 10663          | <i>Parengyodontium album</i>              | Celje ceiling                | linen canvas                        | tempera                | V              | ITS: MZ687373                           | Kavkler et al. 2022 |
| 10693          | <i>Parengyodontium album</i>              | Celje ceiling                | linen canvas                        | tempera                | V              | ITS: MZ687376                           | Kavkler et al. 2022 |
| 10584          | <i>Penicillium bialowiezense</i>          | painting RCS 15              | flax canvas                         | oil                    | V              | BenA: MW357228                          | Zalar et al. 2023   |
| 10484          | <i>Penicillium brevicompactum</i>         | painting GBJ 1               | plywood                             | oil                    | V              | BenA: MW357229                          | Zalar et al. 2023   |
| 10495          | <i>Penicillium chrysogenum</i>            | painting GBJ 2               | unknown canvas                      | oil                    | V              | BenA: MW357233                          | Zalar et al. 2023   |
| 15508          | <i>Penicillium chrysogenum</i>            | painting ART-4               | unknown canvas                      | oil                    | V              | BenA: PP034130                          | Zalar et al. 2023   |
| 7655           | <i>Penicillium corylophilum</i>           | painting RCS 16              | flax canvas                         | oil or greasy tempera  | V              | BenA: MW357217                          | Zalar et al. 2023   |
| 15064          | <i>Penicillium corylophilum</i>           | painting ART-1               | flax canvas                         | oil                    | V              | BenA: MW357214                          | Zalar et al. 2023   |
| 10368          | <i>Penicillium palitans</i>               | painting RCS 26              | flax canvas                         | oil                    | V              | BenA: MW357080                          | Zalar et al. 2023   |
| 10503          | <i>Penicillium rubens</i>                 | painting GBJ 2               | unknown canvas                      | oil                    | V              | BenA: MW357086                          | Zalar et al. 2023   |
| 10557          | <i>Penicillium scabrosum</i>              | painting GBJ 2               | unknown canvas                      | oil                    | V              | BenA: MW357087                          | Zalar et al. 2023   |
| 15049          | <i>Trametes versicolor</i>                | air, RCS depository          | -                                   | -                      | -              | ITS: MW288749                           | Zalar et al. 2023   |
| 10502          | <i>Trichoderma longibrachiatum</i>        | painting GBJ 2               | unknown canvas                      | oil                    | V              | ITS: MW288751                           | Zalar et al. 2023   |
| 10120          | <i>Wallemia aff. muriae</i>               | painting RCS 20              | flax canvas                         | oil and greasy tempera | V              | ITS: MW288065                           | Zalar et al. 2023   |
| 10342          | <i>Wallemia canadensis</i>                | painting RCS 21              | flax canvas                         | oil and greasy tempera | R              | ITS: MW288071                           | Zalar et al. 2023   |
| 10650          | <i>Zalaria obscura</i>                    | painting GM 2                | veneer                              | oil                    | V              | ITS: MW288752                           | Zalar et al. 2023   |

Legend: GM: Regional Museum Goriški muzej, Solkan (Slovenia); GB: Božidar Jakac Art Museum, Kostanjevica na Krki (Slovenia); RCS: Restoration Centre, Institute for the Protection of Cultural Heritage of Slovenia, Ljubljana (Slovenia); ART-1: painting in church, Koper (Slovenia); ART-4: painting in church, Leskovec at Višnja gora (Slovenia). V: isolated from the verso (front side) of the painting; R: isolated from the recto (back side) of the painting. ITS, internal transcribed spacer region including intervening 5.8S rRNA gene; *act*, partial actin gene; *tef1*, partial translation elongation factor 1-alpha gene; *BenA*, partial beta-tubulin gene; For more information on paintings we refer to Zalar et al. (2023). EXF - designation of fungal strains in Ex, Microbial Culture Collection of the Department of Biology, Biotechnical Faculty, University of Ljubljana (Infrastructural Centre Mycosmo, MRIC UL, Slovenia).

#### References:

Zalar, P.; Graf Hriberšek, D.; Gostinčar, C.; Breskvar, M.; Džeroski, S.; Matul, M.; Novak Babič, M.; Čremožnik Zupančič, J.; Kujović, A.; Gunde-Cimerman, N.; et al. Xerophilic Fungi Contaminating Historically Valuable Easel Paintings from Slovenia. *Front. Microbiol.* 2023, 14, doi:10.3389/fmicb.2023.1258670.

Kavkler, K.; Humar, M.; Kržišnik, D.; Turk, M.; Tavzes, Č.; Gostinčar, C.; Džeroski, S.; Popov, S.; Penko, A.; Gunde - Cimerman, N.; et al. A Multidisciplinary Study of Biodeteriorated Celje Ceiling, a Tempera Painting on Canvas. *Int. Biodeterior. Biodegradation* 2022, 170, 105389, doi:https://doi.org/10.1016/j.ibiod.2022.105389.

**Table S2:** Adaptation to low  $a_w$  (xero-tolerance/-phily, halo-tolerance/-phily), growth at different temperatures, production of acids and pigments of tested fungal species.

| EXF          | Fungal name                                | XERO | HALO | TEMP | pH             | PIGM |
|--------------|--------------------------------------------|------|------|------|----------------|------|
| 10648        | <i>Akanthomyces muscarius</i>              | 1    | 2    | 2    | 0              | 0    |
| 10559        | <i>Alternaria</i> sp.                      | 2    | 1    | 2    | 0              | 1    |
| 10651        | <i>Alternaria</i> sp.                      | 2    | 2    | 2    | 0              | 0    |
| 7660         | <i>Aspergillus conicus</i>                 | 3    | 3    | 2    | 0 <sup>^</sup> | 0    |
| 7677         | <i>Aspergillus creber</i>                  | 3    | 3    | 2    | 0 <sup>^</sup> | 0    |
| 10360        | <i>Aspergillus destruens</i>               | 3    | 3    | 2    | 0 <sup>^</sup> | 0    |
| <b>7651</b>  | <b><i>Aspergillus destruens</i></b>        | 4    | 4    | 2    | 0 <sup>^</sup> | 0    |
| <b>10462</b> | <b><i>Aspergillus domesticus</i></b>       | 4    | 4    | 1    | 0 <sup>^</sup> | 0    |
| <b>10450</b> | <b><i>Aspergillus infrequens</i></b>       | 4    | 4    | 3    | 0 <sup>^</sup> | 0    |
| 10405        | <i>Aspergillus jensenii</i>                | 3    | 3    | 2    | 0 <sup>^</sup> | 1    |
| <b>10353</b> | <b><i>Aspergillus magnivesiculatus</i></b> | 4    | 4    | 4    | 0 <sup>^</sup> | 0    |
| <b>10425</b> | <b><i>Aspergillus penicillioides</i></b>   | 4    | 4    | 4    | 0 <sup>^</sup> | 0    |
| 15555        | <i>Aspergillus proliferans</i>             | 3    | 5    | 1    | 0              | 1    |
| 15119        | <i>Aspergillus pseudoglaucus</i>           | 3    | 3    | 2    | 0 <sup>^</sup> | 1    |
| 14316        | <i>Aspergillus pseudoglaucus</i>           | 3    | 3    | 2    | 0              | 1    |
| 7678         | <i>Aspergillus puulaauensis</i>            | 3    | 3    | 2    | 0 <sup>^</sup> | 0    |
| 10429        | <i>Aspergillus reticulatus</i>             | 3    | 3    | 2    | 0 <sup>^</sup> | 0    |
| <b>10401</b> | <b><i>Aspergillus salinicola</i></b>       | 5    | 3    | 2    | 0 <sup>^</sup> | 0    |
| <b>7656</b>  | <b><i>Aspergillus sloanii</i></b>          | 4    | 3    | 2    | 0 <sup>^</sup> | 0    |
| <b>10431</b> | <b><i>Aspergillus tardicrescens</i></b>    | 4    | 4    | 2    | 0 <sup>^</sup> | 0    |
| <b>10463</b> | <b><i>Aspergillus vitricola</i></b>        | 4    | 4    | 2    | 0 <sup>^</sup> | 0    |
| <b>15210</b> | <b><i>Aspergillus vitricola</i></b>        | 4    | 4    | 3    | 0 <sup>^</sup> | 0    |
| 10372        | <i>Aureobasidium melanogenum</i>           | 3    | 2    | 2    | 0              | 0    |
| 14317        | <i>Aureobasidium pullulans</i>             | 2    | 3    | 2    | 0              | 0    |
| 10556        | <i>Beauveria pseudobassiana</i>            | 1    | 1    | 2    | 0              | 0    |
| 15111        | <i>Bjerkandera adusta</i>                  | 0    | 0    | 3    | 0              | 0    |
| 10840        | <i>Botryotrichum domesticum</i>            | 1    | 0    | 2    | 0              | 0    |
| 7669         | <i>Chaetomium cochlioides</i>              | 1    | 1    | 2    | 0              | 0    |
| 7690         | <i>Chaetomium globosum</i>                 | 1    | 0    | 2    | 0              | 1    |
| 10573        | <i>Cladosporium allcinum</i>               | 2    | 2    | 3    | 0              | 0    |
| 14315        | <i>Cladosporium cladosporioides</i>        | 3    | 2    | 2    | 0              | 1    |
| 10496        | <i>Cladosporium pseudocladosporioides</i>  | 2    | 2    | 2    | 0              | 0    |
| 14314        | <i>Cladosporium pseudocladosporioides</i>  | 3    | 2    | 3    | 0              | 0    |
| 10492        | <i>Cladosporium westerdijkiae</i>          | 2    | 2    | 3    | 0              | 0    |
| 10656        | <i>Cladosporium xylophilum</i>             | 2    | 2    | 3    | 0              | 0    |
| 15505        | <i>Coniochaeta ligninaria</i>              | 1    | 1    | 3    | 0              | 0    |
| 15086        | <i>Cylindrobasidium</i> sp.                | 1    | 0    | 3    | 0              | 0    |
| 10652        | <i>Debaryomyces hansenii</i>               | 3    | 3    | 3    | 0              | 0    |
| 10694        | <i>Parengyodontium album</i>               | 1    | 2    | 3    | 0              | 0    |

|              |                                    |   |   |   |    |   |
|--------------|------------------------------------|---|---|---|----|---|
| 10663        | <i>Parengyodontium album</i>       | 1 | 2 | 2 | 0  | 0 |
| 10693        | <i>Parengyodontium album</i>       | 1 | 2 | 3 | 0  | 0 |
| 10584        | <i>Penicillium bialowiezense</i>   | 3 | 3 | 2 | 1  | 0 |
| 10484        | <i>Penicillium brevicompactum</i>  | 3 | 3 | 2 | 1  | 0 |
| 10495        | <i>Penicillium chrysogenum</i>     | 3 | 3 | 3 | 2  | 1 |
| 15508        | <i>Penicillium chrysogenum</i>     | 3 | 3 | 3 | 2  | 1 |
| 7655         | <i>Penicillium corylophilum</i>    | 3 | 3 | 2 | 1  | 0 |
| 15064        | <i>Penicillium corylophilum</i>    | 3 | 3 | 3 | 1  | 1 |
| 10368        | <i>Penicillium palitans</i>        | 3 | 3 | 2 | 2  | 0 |
| 10503        | <i>Penicillium rubens</i>          | 3 | 3 | 3 | 1  | 1 |
| 10557        | <i>Penicillium scabrosum</i>       | 3 | 3 | 2 | 2  | 1 |
| 15049        | <i>Trametes versicolor</i>         | 1 | 0 | 3 | 0  | 0 |
| 10502        | <i>Trichoderma longibrachiatum</i> | 1 | 1 | 3 | 0  | 1 |
| <b>10120</b> | <b><i>Wallemia aff. muriae</i></b> | 4 | 4 | 2 | 0^ | 0 |
| 10342        | <i>Wallemia canadensis</i>         | 3 | 3 | 2 | 0^ | 0 |
| 10650        | <i>Zalaria obscura</i>             | 2 | 3 | 3 | 0  | 0 |

Legend: Activities are shown as groups according to four criteria: (i) 0-5 shown in red, (ii) 1-4 shown in green, (iii) 0-2 shown in blue, (iv) 0-1 shown in yellow; 0 = no activity; 1, 2 or 5 = maximum activities, except for the green criteria; XERO: xerophily; 0= non-xerotolerant fungi (growth only in medium without added glycerol); 1= weakly xerotolerant (growth on agar media without and with 18% glycerol); 2= moderately xerotolerant; 3= moderately xerophilic (growth on all tested agar media); 4= obligately or extremely xerophilic fungi growing on 18% glycerol; 5= obligately or extremely xerophilic fungi growing only on 30 and 40% glycerol. HALO: halophily; 0= non-halotolerant (no growth on media supplemented with 10% NaCl); 1= weakly halotolerant (growth without and with 10% NaCl); 2= moderately halotolerant (growth without and with maximally 15% NaCl); 3= moderately halophilic (growth at 10, 20, and 25% NaCl); 4= obligately or extremely halophilic fungi growing only in the presence of 10 or 15% NaCl; and 5= obligately or extremely halophilic fungi growing at minimally 15% NaCl. TEMP: temperature test (1=growth at 15 °C, no growth at 24 and 37 °C; 2= growth at 15 °C and 24 °C, no growth at 37 °C; 3= growth at 15, 24 and 37 °C; 4= growth at 24 and 37 °C, no growth at 15 °C. pH: acid production (0= no change in pH, final pH 6.0–6.1; 1= final pH 5.0–5.9; 2= final pH 4.0–4.9). PIGM: production of soluble pigments (0= no production; 1= pigment production), ^ addition of 10% NaCl. Strain numbers in bold: obligate or extreme xerophiles.

**Table S3:** Enzymatic (amylase, endocellulase,  $\beta$ -glucosidase, caseinase, gelatinase, esterase, lipase, lecithinase, laccase, urease, and DNase) and other activities (assimilation of hydrocarbons, dissolution of  $\text{CaCO}_3$  and siderophore formation) of tested fungal species.

| EXF   | Fungal name                               | AMY | ENDO | $\beta$ -GLU | CAS | GEL | ES | LIP | LEC | LAC<br>gua | LAC<br>abts | URE | DNA | $\text{CaCO}_3$ | HEX | MO | SID |
|-------|-------------------------------------------|-----|------|--------------|-----|-----|----|-----|-----|------------|-------------|-----|-----|-----------------|-----|----|-----|
| 10648 | <i>Akanthomyces muscarius</i>             | 1   | 0    | 5            | 1   | 0   | 1  | 0   | 0   | 0          | 0           | 1   | 1   | 2               | 2   | 2  | 4   |
| 10559 | <i>Alternaria</i> sp.                     | 1   | 1    | 2            | 1   | 1   | 1  | 0   | 1   | 0          | 0           | 0   | 0   | 0               | 2   | 0  | 0^  |
| 10651 | <i>Alternaria</i> sp.                     | 1   | 1    | 1            | 1   | 0   | 1  | 0   | 1   | 0          | 0           | 1   | 2   | 0               | 2   | 0  | 0   |
| 7660  | <i>Aspergillus conicus</i>                | 0*  | 4*   | 5*           | 0*  | 0*  | 2  | 0   | 0   | 0*         | 0*          | 1   | 0*  | 1*              | 2°  | 0° | 3*^ |
| 7677  | <i>Aspergillus creber</i>                 | 1*  | 1    | 1*           | 1*  | 2*  | 1  | 3   | 1   | 0*         | 0*          | 1*  | 3   | 0               | 0°  | 1° | 0   |
| 7651  | <i>Aspergillus destruens</i>              | 1*  | 0*   | 4*           | 0*  | 0*  | 0  | /   | 0   | 0*         | 0*          | 0*  | 1*^ | 1*              | 0°  | 0° | 0*  |
| 10360 | <i>Aspergillus destruens</i>              | 0*  | 2*   | 4*           | 0*  | 0*  | 5  | 0   | 0   | 0*         | 0*          | 0*  | 0*  | 1*              | 0°  | 0° | 5*^ |
| 10462 | <i>Aspergillus domesticus</i>             | 1*  | 1*   | 3*           | 0*  | 0*  | 0* | 0   | 0   | 0*         | 0*          | 0*  | 4*^ | 1*              | 1°  | 0° | 5*^ |
| 10450 | <i>Aspergillus infrequens</i>             | 1*  | 0    | 3*           | 0*  | 0*  | 0  | /   | 0   | 0*         | 0*          | 1*  | 3*^ | 1               | 2°  | 0° | 0*  |
| 10405 | <i>Aspergillus jensenii</i>               | 1*  | 5*   | 1*           | 0*  | 5   | 4  | 2   | 1   | 0*         | 0*          | 1*  | 4   | 0               | 0°  | 2° | 0^  |
| 10353 | <i>Aspergillus magnivesiculatus</i>       | 1*  | 2*   | 1*           | 0*  | 0*  | 0* | /   | 0   | 0*         | 0*          | 1*  | 3*  | 0*              | 1°  | 0° | 0*  |
| 10425 | <i>Aspergillus penicillioides</i>         | /   | 3*   | 3*           | 0*  | 0*  | 0* | 3   | 1   | 0*         | 0*          | 1*  | 3*^ | 0*              | 0°  | 0° | 0*  |
| 15555 | <i>Aspergillus proliferans</i>            | 0   | 0    | 1*           | 1*  | 1*  | 0  | 5   | 1   | 0*         | 0*          | 1   | 0*  | 0               | 0°  | 0° | 0*  |
| 15119 | <i>Aspergillus pseudoglaucus</i>          | 1*  | 0    | 1*           | 0*  | 0*  | 3  | 2   | 1   | 0          | 0           | 0*  | 2   | 1               | 0°  | 0° | 0   |
| 14316 | <i>Aspergillus pseudoglaucus</i>          | 0   | 0    | 4*           | 0*  | 0*  | 4  | 2   | 1   | 0          | 0           | 0*  | 1   | 1               | 0°  | 0° | 0   |
| 7678  | <i>Aspergillus puulaauensis</i>           | 2*  | 2    | 1*           | 0*  | 0   | 3  | 1   | 1   | 0          | 0           | 1*  | 3   | 0               | 0°  | 2° | 0   |
| 10429 | <i>Aspergillus reticulatus</i>            | 1*  | 2*   | 3*           | 0*  | 0*  | 5  | 0   | 0   | 0*         | 0*          | 1*  | 0*  | 1*              | 2°  | 0° | 0*  |
| 10401 | <i>Aspergillus salinicola</i>             | 1*  | 0    | 1*           | 0*  | 0*  | 3  | 2   | 1   | 0*         | 0*          | 1*  | 3*  | 0*              | 0°  | 0° | 0*  |
| 7656  | <i>Aspergillus sloanii</i>                | 1   | 1*   | 2            | 0*  | 0*  | 0* | 0   | 1   | 0*         | 0*          | 1*  | 0*  | 0               | 0°  | 0° | 0*  |
| 10431 | <i>Aspergillus tardicrescens</i>          | 1*  | 4*   | 3*           | 0*  | 0*  | 0* | /   | 0   | 0*         | 0*          | 0*  | 3*^ | 1*              | 0°  | 0° | 0*  |
| 10463 | <i>Aspergillus vitricola</i>              | 0*  | 0*   | 1*           | 0*  | 0*  | 0* | /   | 0   | 0*         | 0*          | 0*  | 5*^ | 1*              | 0°  | 0° | 0*  |
| 15210 | <i>Aspergillus vitricola</i>              | 0*  | 1*   | 2*           | 0*  | 0*  | 0* | /   | 0   | 0*         | 0*          | 0*  | 0*  | 0               | 0°  | 0° | 0*  |
| 10372 | <i>Aureobasidium melanogenum</i>          | 1   | 2    | 2            | 4   | 0   | 5  | 1   | 0   | 0          | 0           | 1   | 4   | 2               | 1   | 0  | 0   |
| 14317 | <i>Aureobasidium pullulans</i>            | 4   | 2    | 2            | 0   | 2   | 5  | 4   | 1   | 0          | 0           | 1   | 5   | 2               | 0   | 0  | 0   |
| 10556 | <i>Beauveria pseudobassiana</i>           | 1   | 0    | 4            | 0   | 0   | 1  | 0   | 0   | 3          | 5           | 1   | 0   | 1               | 2   | 2  | 1   |
| 15111 | <i>Bjerkandera adusta</i>                 | 1   | 0    | 0            | 1   | 1   | 0  | 0   | 0   | 0          | 0           | 0   | 0   | 1               | 0   | 0  | 0   |
| 10840 | <i>Botryotrichum domesticum</i>           | 2   | 1    | 2            | 0   | 0   | 1  | 0   | 0   | 0          | 0           | 1   | 2   | 0               | 2   | 0  | 0   |
| 7669  | <i>Chaetomium cochlioides</i>             | 0   | 1    | 1            | 0   | /   | 1  | 0   | 0   | 0          | 0           | 1   | 0   | 0               | 2^  | 1^ | 0   |
| 7690  | <i>Chaetomium globosum</i>                | 1   | 1    | 2            | 0   | /   | 1  | 0   | 0   | 0          | 0           | 1   | 0   | 0               | 2   | 1  | 0   |
| 10573 | <i>Cladosporium allcinum</i>              | 3   | 2    | 4            | 3   | 1   | 5  | 0   | 0   | 3          | 2           | 1   | 4   | 0               | 1   | 0  | 0   |
| 14315 | <i>Cladosporium cladosporioides</i>       | 1   | 2    | 2            | 2   | 1   | 3  | 1   | 1   | 5          | 5           | 1   | 4   | 0               | 1   | 0  | 0   |
| 10496 | <i>Cladosporium pseudocladosporioides</i> | 2   | 2    | 2            | 1   | 0   | 5  | 0   | 0   | 0          | 1           | 1   | 2   | 0               | 1   | 0  | 0   |

|       |                                           |    |    |    |                |    |    |   |   |    |    |                |                |   |                |                |                |
|-------|-------------------------------------------|----|----|----|----------------|----|----|---|---|----|----|----------------|----------------|---|----------------|----------------|----------------|
| 14314 | <i>Cladosporium pseudocladosporioides</i> | 3  | 2  | 2  | 4              | 0  | 5  | / | 0 | 0  | 0  | 1              | 3              | 0 | 1              | 0              | 0              |
| 10492 | <i>Cladosporium westerdijkiae</i>         | 1  | 2  | 3  | 1              | 1  | 3  | 0 | 0 | 2  | 3  | 1              | 1              | 0 | 1              | 0              | 0              |
| 10656 | <i>Cladosporium xylophilum</i>            | 1  | 2  | 4  | 1              | 0  | 5  | 0 | 0 | 0  | 0  | 1              | 2              | 0 | 1              | 0              | 0              |
| 15505 | <i>Coniochaeta ligninaria</i>             | 1  | 1  | 2  | 1              | 0  | 3  | 0 | 1 | 0  | 0  | 1              | 4 <sup>^</sup> | 1 | 2 <sup>^</sup> | 0 <sup>^</sup> | 0              |
| 15086 | <i>Cylindrobasidium</i> sp.               | /  | 0  | 1  | 1              | 2  | 1  | 0 | 0 | 0  | 0  | 0              | 0              | 0 | 0              | 0              | 0              |
| 10652 | <i>Debaryomyces hansenii</i>              | 0  | 0  | 5  | 0              | 0  | 5  | 0 | 0 | 0  | 0  | 1 <sup>^</sup> | 0              | 0 | 0              | 0              | 0              |
| 10663 | <i>Parengyodontium album</i>              | 1  | 1  | 3  | 5              | 0  | 3  | 2 | 1 | 0  | 0  | 1              | 2              | 0 | 2 <sup>^</sup> | 2 <sup>^</sup> | 0              |
| 10693 | <i>Parengyodontium album</i>              | 1  | 1  | 3  | 1              | 0  | 3  | 3 | 1 | 0  | 0  | 1              | 2              | 0 | 2 <sup>^</sup> | 2 <sup>^</sup> | 0              |
| 10694 | <i>Parengyodontium album</i>              | 1  | 1  | 4  | 1              | 0  | 1  | 1 | 1 | 0  | 0  | 1              | 3              | 0 | 2 <sup>^</sup> | 2 <sup>^</sup> | 0              |
| 10584 | <i>Penicillium bialowiezense</i>          | 1* | 5* | 4  | 0*             | 2  | 3  | 2 | 1 | 0  | 0  | 1              | 5              | 2 | 2              | 2              | 0              |
| 10484 | <i>Penicillium brevicompactum</i>         | 4  | 3  | 4  | 5              | 1  | 4  | 2 | 1 | 0  | 0  | 1              | 5              | 1 | 2              | 1              | 5              |
| 10495 | <i>Penicillium chrysogenum</i>            | 5  | 1  | 2  | 0              | 2  | 1  | 1 | 1 | 0  | 0  | 1              | 2              | 2 | 2              | 2              | 1              |
| 15508 | <i>Penicillium chrysogenum</i>            | 4  | 1  | 2  | 0              | 2  | 2  | 0 | 1 | 0  | 0  | 1              | 3              | 2 | 2              | 0              | 2              |
| 7655  | <i>Penicillium corylophilum</i>           | 2  | 0  | 3  | 1              | 0  | 4  | 0 | 0 | 0  | 0  | 0 <sup>^</sup> | 1              | 0 | 2              | 2              | 2 <sup>^</sup> |
| 15064 | <i>Penicillium corylophilum</i>           | 1  | 0  | 5  | 1 <sup>^</sup> | 0  | 2  | 0 | 1 | 0  | 0  | 1              | 1              | 0 | 2              | 2              | 0              |
| 10368 | <i>Penicillium palitans</i>               | 5  | 2  | 4  | 0              | 0  | 2  | 2 | 1 | 0  | 0  | 1              | 1              | 2 | 2              | 2              | 4              |
| 10503 | <i>Penicillium rubens</i>                 | 4  | 1  | 1  | 0              | 4  | 1  | 0 | 1 | 0  | 0  | 1              | 1              | 2 | 2              | 2              | 1              |
| 10557 | <i>Penicillium scabrosum</i>              | 2  | 1  | 3  | 5              | 5  | 2  | 1 | 1 | 0  | 0  | 1              | 4              | 1 | 2              | 2              | 2              |
| 15049 | <i>Trametes versicolor</i>                | 0  | 0  | 1  | 0              | 0  | 0  | 0 | 0 | 1  | 0  | 0              | 0              | 0 | 1              | 0              | 0              |
| 10502 | <i>Trichoderma longibrachiatum</i>        | 1  | 1  | 1  | 1              | 2  | 1  | 0 | 1 | 0  | 0  | 1              | 2              | 0 | 0              | 0              | 0 <sup>^</sup> |
| 10120 | <b><i>Wallemia aff. muriae</i></b>        | 0* | 5* | 3* | 0*             | 0* | 0* | / | 0 | 0* | 0* | 1*             | 0*             | 0 | 0°             | 0°             | 0*             |
| 10342 | <i>Wallemia canadensis</i>                | 0* | 5* | 4  | 0*             | 0* | 2  | 0 | 0 | 0* | /  | 1*             | 0*             | 0 | 0°             | 0°             | 0*             |
| 10650 | <i>Zalaria obscura</i>                    | 5  | 0  | 5  | 0              | 0  | 2  | 0 | 0 | 0  | 0  | 1              | 0              | 2 | 0              | 0              | 0              |

Legend: Activities are shown as factors according to three criteria: (i) 0-5 shown in red, (ii) 0-1 shown in yellow and (iii) 0-2 shown in blue; 0 = no activity, maximum value (1,2 or 5) = maximum activity. AMY: amylase; ENDO: endocellulase;  $\beta$ -GLU:  $\beta$ -glucosidase; CAS: caseinase; GEL: gelatinase; ES: esterase, LIP: lipase; LEC: lecithinase; LAC: laccase (GUA: guaiacol, abts: ABTS); URE: urease; DNA: DNase; CaCO<sub>3</sub>: carbonate (CaCO<sub>3</sub>) dissolution; HEX: assimilation of hexadecane, MO: assimilation of mineral oil; SID: siderophores formation. \* reduced water activity with addition of 18% glycerol; ° reduced water activity with addition of 10% NaCl; ^ prolonged incubation; / no information; extreme values are underlined. Obligately or extremely xerophilic species are bolded.



## 2 Supplementary Figures

**Figure S1.** Biodegradation assays with negative (upper row) and positive (lower row) enzymatic activities.

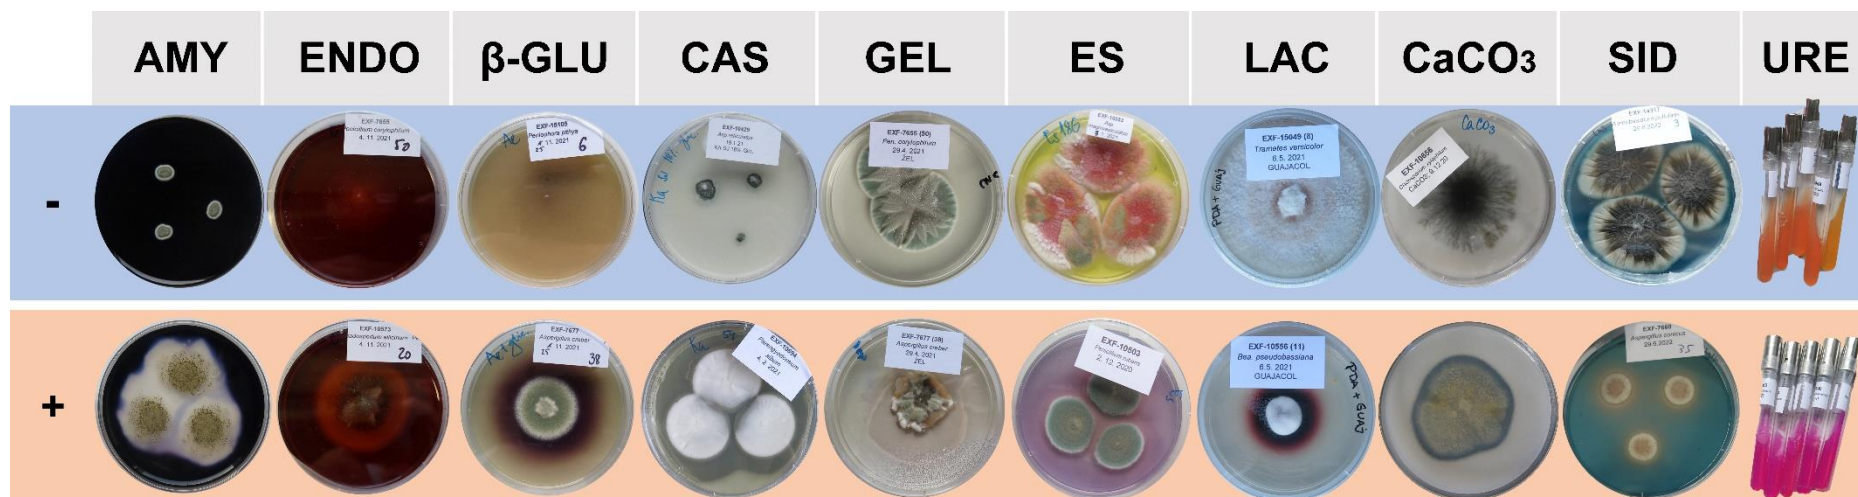

Legend: AMY: amylase - white unstained area around colonies in the otherwise violet medium dyed with iodine solution indicates starch degradation; ENDO: endoglucanase - light red halo on CMC agar dyed with Congo Red indicates cellulose degradation; β-GLU: β-glucosidase - black precipitate indicates β-glucosidase activity on aesculin agar; CAS: caseinase - transparent zone in otherwise opaque medium indicates casein degradation; GEL: gelatinase - solubilization of gelatine; ES: esterase - color change of pH indicator from yellow to purple indicates esterase activity; LAC: laccase - red halo indicates laccase activity on agar containing guaiacol; CaCO<sub>3</sub>: CaCO<sub>3</sub> solubilization - transparent zone in otherwise opaque medium indicates carbonate dissolution; SID: siderophore production - orange stained areas around colonies indicate synthesis of siderophores; URE: urease - change of pH indicator from orange to purple indicates urea degradation.
